# Supplementary material
Source: publisher site journal article supplement (https://www.dovepress.com/article/supplementary_file/618019/618019%20Supplementary%20File.docx)
Supplement: Supplementary file 1 [file 618019%20Supplementary%20File.docx]

**Supplementary File 1** **English version of the 48-item questionnaire developed for the study** **“Patient Preferences for Direct versus Indirect Dental Veneers: Associations with Durability, Socioeconomic Status, and Satisfaction”**

**Instructions:** Thank you for participating in this study. Please answer all questions honestly. There are no right or wrong answers. The questionnaire should take about 10-15 minutes to complete. All responses are confidential.

**Section 1: Socio-demographic Information (Items 1–9)**

1. What is your age? (in years) ________
2. What is your gender? ☐ Male ☐ Female ☐ Prefer not to say
3. What is your nationality / country of birth? ________________________
4. How long have you been living in Erbil as an expatriate? ☐ Less than 6 months ☐ 6–12 months ☐ 1–3 years ☐ More than 3 years
5. What is your highest level of education? ☐ Low (primary or below) ☐ Medium (secondary/high school) ☐ High (university degree or higher)
6. What is your current occupation? ________________________
7. How would you rate your current economic/financial status? ☐ Very poor ☐ Poor ☐ Medium ☐ Good ☐ Very good
8. Are you currently a student? ☐ Yes ☐ No
9. Have you ever received any cosmetic dental treatment before? ☐ Yes ☐ No

**Section 2: Prior Dental Experience and Information Sources (Items 10–18)**

1. Have you ever received dental veneers (direct or indirect)? ☐ Yes ☐ No
2. If yes, what type of veneers did you receive? (select all that apply) ☐ Direct composite veneers ☐ Indirect ceramic/porcelain veneers ☐ Both
3. How many veneers have you had in total? ________
4. Where did you first hear about dental veneers? (choose one main source) ☐ Dentist recommendation ☐ Social media (Instagram, etc.) ☐ Friends/family ☐ Internet search ☐ Television/magazine ☐ Other: ________
5. Have you had any previous dental restorations (fillings, crowns, etc.)? ☐ Yes ☐ No
6. How satisfied were you with your previous dental treatments overall? (1 = Very dissatisfied, 5 = Very satisfied) _____
7. Do you have regular dental check-ups? ☐ Yes (every 6 months) ☐ Occasionally ☐ Only when problem arises ☐ Never
8. Have you ever searched for information about direct vs indirect veneers? ☐ Yes ☐ No
9. Rate your current knowledge about the difference between direct and indirect veneers (1 = No knowledge, 5 = Excellent knowledge) _____

**Section 3: Decision-making Factors (Items 19–35)**

Please rate how important each of the following factors is to you when considering dental veneers. (5-point Likert scale: 1 = Not important at all, 2 = Slightly important, 3 = Moderately important, 4 = Important, 5 = Very important)

1. Aesthetic outcome / natural appearance of the smile
2. Durability / longevity of the veneers
3. Cost of the treatment
4. Treatment time / number of visits required
5. Minimally invasive preparation (how much tooth structure is removed)
6. Ease of repair if damaged
7. Resistance to staining / discoloration
8. Comfort during and after treatment
9. Reversibility of the procedure
10. Recommendation from the dentist
11. Influence of social media / celebrity smiles
12. Pain or sensitivity after treatment
13. Maintenance required (cleaning, polishing)
14. Possibility of achieving “Hollywood Smile”
15. Trust in the dental clinic / dentist’s experience
16. Availability of flexible payment plans
17. Long-term gum health around the veneers

**Section 4: Veneer-type Preference and Reasons (Items 36–41)**

1. Which type of veneer do you prefer? ☐ Direct composite veneers (done in one visit, chairside) ☐ Indirect veneers (ceramic/porcelain, made in lab) ☐ Undecided / need more information
2. If you prefer **indirect** veneers, what is the main reason? (choose one) ☐ Better durability ☐ Superior aesthetics ☐ Longer lasting ☐ Other: ________
3. If you prefer **direct** veneers, what is the main reason? (choose one) ☐ Lower cost ☐ Single visit / faster ☐ Less tooth reduction ☐ Other: ________
4. How much would you be willing to pay for indirect veneers compared to direct? (per tooth) (Open or options: e.g., Same price / 20% more / 50% more / etc.)
5. Would you choose indirect veneers if they last twice as long as direct ones? ☐ Yes ☐ No ☐ Maybe
6. What is the maximum number of dental visits you are willing to attend for veneer treatment? ________

**Section 5: Satisfaction and Recommendation (Items 42–48)**

(For those who have received veneers – if not, skip to general questions)

1. Overall, how satisfied are you with your veneers? (1 = Very dissatisfied … 5 = Very satisfied) _____
2. How satisfied are you with the **aesthetic** result? (1–5) _____
3. How satisfied are you with the **durability** so far? (1–5) _____
4. How satisfied are you with the **cost-effectiveness**? (1–5) _____
5. Would you recommend the same type of veneers to a friend or family member? ☐ Yes ☐ No ☐ Unsure
6. On a scale of 1–5, how likely are you to recommend veneers in general? (1 = Not at all likely … 5 = Extremely likely) _____
7. Any additional comments about your experience or preferences? (open text) ________________________

**End of Questionnaire** Thank you very much for your participation!
